# Supplementary figures and images for: Arteriovenous Shunts: Their Location and Role in Physiology, Pathology, and Tissue Transfer. A Preliminary Report in the Upper Limb
Source: PubMed Central journal article supplement — Plast Reconstr Surg Glob Open. 2024 Sep 6;12(9):e6127. doi: 10.1097/GOX.0000000000006127 (PMC11379487; doi:10.1097/gox.0000000000006127), 2024-09-06

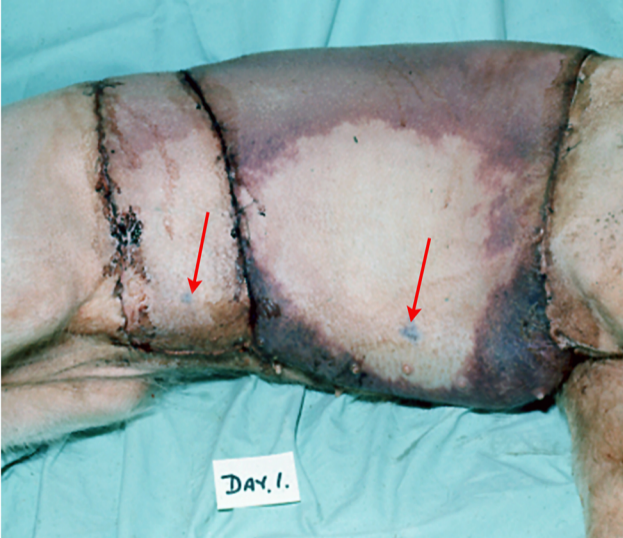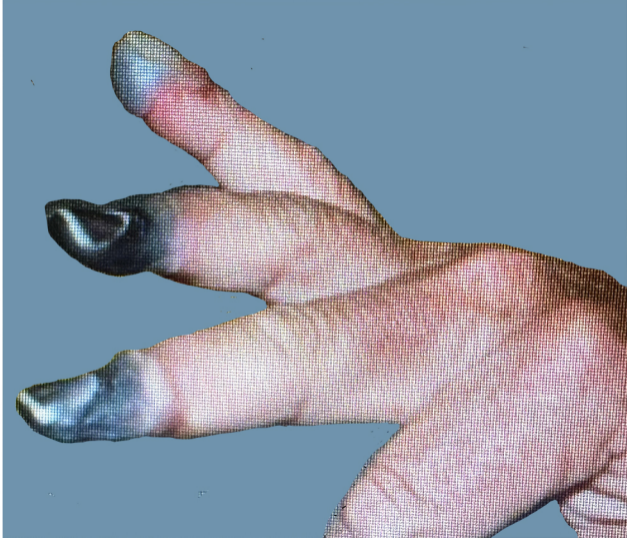

Supplement: gox-12-e6127-s001.pdf [file gox-12-e6127-s001.pdf]
